# Supplementary material for: Saturation Mutagenesis of the HIV-1 Envelope CD4 Binding Loop Reveals Residues Controlling Distinct Trimer Conformations
Source: PLoS Pathog. 2016 Nov 7;12(11):e1005988. doi: 10.1371/journal.ppat.1005988 (PMC5098743; doi:10.1371/journal.ppat.1005988)
Supplement: S13 Table — The fitness effect of each codon substitution in two experimental replicates of P1 library (Excel file). (XLSX) [file ppat.1005988.s013.xlsx]

## Sheet: S13 Table
	S13 Table
	Datasets of codon fitness effects
					Fitness Effect (normalized so that average WT synonym=0 and average stop=-1)
	Amino Acid Position	Codon	Encoded Amino Acid	ignore	Rep1	Rep2
	361	aaa	K	0	-1	-1.36011
	361	aac	N	0	-1	-1.27587
	361	aag	K	0	-1	-1.16421
	361	aat	N	0	-1	-1.21875
	361	aca	T	0	-1.39322	-1
	361	acc	T	0	-1.27014	-1.44437
	361	acg	T	0	-1	-1
	361	act	T	0	-1	-1
	361	aga	R	0	-1	-1
	361	agc	S	0	-1.08627	-1.15738
	361	agg	R	0	-1.04887	-1
	361	agt	S	0	-1.10356	-1
	361	ata	I	0	-0.175782	-0.557466
	361	atc	I	0	-1.03519	-1.12334
	361	atg	M	0	-1.03984	-0.290505
	361	att	I	0	-0.997398	-0.890611
	361	caa	Q	0	-1.15864	-1
	361	cac	H	0	-1.10814	-1
	361	cag	Q	0	-1	-1.07922
	361	cat	H	0	-1.25298	-1.16468
	361	cca	P	0	-1	-1.26363
	361	ccc	P	0	-1.18008	-1.41441
	361	ccg	P	0	-1.34902	-1.33245
	361	cct	P	0	-1	-1.1438
	361	cga	R	0	-1	-1.18216
	361	cgc	R	0	-1.27472	-1
	361	cgg	R	0	-1	-1.15022
	361	cgt	R	0	-1	-1.26239
	361	cta	L	0	-0.163956	-0.179662
	361	ctc	L	0	0.744647	-0.169573
	361	ctg	L	0	-0.813232	-1.07922
	361	ctt	L	0	-0.29477	0.282633
	361	gaa	E	0	-1	-1
	361	gac	D	0	-1.05238	-1
	361	gag	E	0	-1	-1
	361	gat	D	1	-0.872765	-102.922
	361	gca	A	0	-1	-1
	361	gcc	A	0	-1.45264	-1
	361	gcg	A	0	-1	-1
	361	gct	A	0	-1	-1
	361	gga	G	0	-1	-1
	361	ggc	G	0	-1	-1
	361	ggg	G	0	-1.17537	-1.11297
	361	ggt	G	0	-1.25511	-1
	361	gta	V	0	0.367561	-0.591543
	361	gtc	V	0	-1.09364	-1.16229
	361	gtg	V	0	0.167717	-0.347997
	361	gtt	V	0	-1.0178	-1.14516
	361	taa	*	0	-1	-1
	361	tac	Y	0	-0.0838216	-0.506301
	361	tag	*	0	-1	-1
	361	tat	Y	0	0.229051	-0.968761
	361	tca	S	0	-1	-1
	361	tcc	S	0	-1.33952	-1.32612
	361	tcg	S	0	-1	-1
	361	tct	S	0	-0.692483	-0.76814
	361	tga	*	0	-1.06466	-1.35053
	361	tgc	C	0	-1	-1
	361	tgg	W	1	0.396794	-0.0990476
	361	tgt	C	0	-1.11832	-1.07496
	361	tta	L	0	0.327181	-0.72556
	361	ttc	F	0	-0.184571	-0.60745
	361	ttg	L	0	-0.992904	-1.09517
	361	ttt	F	0	0.396794	-0.0990476
	362	aaa	K	0	-0.0209659	-0.250601
	362	aac	N	0	0.486189	-0.513011
	362	aag	K	0	0.0650771	-0.215797
	362	aat	N	0	0.396794	-0.0990476
	362	aca	T	0	0.444252	-0.784543
	362	acc	T	0	-0.884097	-0.0238362
	362	acg	T	0	0.00390254	0.104945
	362	act	T	0	-0.769726	-0.629024
	362	aga	R	0	-0.0373476	-0.852541
	362	agc	S	0	-0.886352	0.0925914
	362	agg	R	0	-0.285186	-0.198939
	362	agt	S	0	0.120908	-0.598286
	362	ata	I	0	0.0808467	-0.457028
	362	atc	I	1	-1.12598	-0.94288
	362	atg	M	0	-0.39311	-0.272864
	362	att	I	0	-0.29565	-0.522157
	362	caa	Q	0	-1.03425	-0.047226
	362	cac	H	0	-1.00071	-1.14344
	362	cag	Q	0	0.372189	-0.930105
	362	cat	H	0	0.0190141	-0.443167
	362	cca	P	0	-1.41029	-1.1734
	362	ccc	P	0	-1.44503	-1.23195
	362	ccg	P	0	-1.52795	-1.18342
	362	cct	P	0	-0.991766	-1.19818
	362	cga	R	0	-0.893879	-0.905419
	362	cgc	R	0	-0.0217438	-0.518484
	362	cgg	R	0	0.433927	-0.121879
	362	cgt	R	0	0.0846014	-0.167906
	362	cta	L	0	-1.38266	-0.444259
	362	ctc	L	0	-1.13938	-1
	362	ctg	L	1	-0.713111	-1.01251
	362	ctt	L	1	-0.839416	-0.785346
	362	gaa	E	0	0.256572	0.090024
	362	gac	D	0	0.57459	-0.707369
	362	gag	E	0	0.0316455	-0.0656253
	362	gat	D	0	0.597487	0.112747
	362	gca	A	0	0.274316	-0.0563879
	362	gcc	A	0	-0.729	-1.01454
	362	gcg	A	0	-0.880383	-0.751938
	362	gct	A	0	-0.652665	0.210064
	362	gga	G	0	-0.416294	-0.314169
	362	ggc	G	0	-1.28853	-0.165235
	362	ggg	G	0	-0.332177	-0.758018
	362	ggt	G	0	-0.954644	-0.882116
	362	gta	V	0	-0.754078	-0.848034
	362	gtc	V	1	-1.11439	-0.214089
	362	gtg	V	0	0.459729	-0.512924
	362	gtt	V	0	-1.30345	-0.492323
	362	taa	*	0	-1	-1.04947
	362	tac	Y	0	-0.967288	-0.582823
	362	tag	*	0	-0.972733	-1.02102
	362	tat	Y	0	-0.821827	-0.390292
	362	tca	S	0	-1.16374	-0.110173
	362	tcc	S	0	0.218735	-0.38719
	362	tcg	S	0	-1	-0.373421
	362	tct	S	1	-153.319	-0.450275
	362	tga	*	0	-1	-1
	362	tgc	C	0	-0.81932	-0.695477
	362	tgg	W	0	-1.10768	-1.27542
	362	tgt	C	0	-1.12261	-1.34607
	362	tta	L	0	-0.329561	-0.408442
	362	ttc	F	1	-1.37409	-0.73868
	362	ttg	L	0	-0.713247	-0.587519
	362	ttt	F	0	-0.624292	-0.838829
	363	aaa	K	0	0.104861	-0.403531
	363	aac	N	0	-0.356034	-0.683869
	363	aag	K	0	0.166904	-1.05502
	363	aat	N	0	-0.150586	-1.02267
	363	aca	T	0	-0.2719	-0.566431
	363	acc	T	0	-0.900661	-0.724737
	363	acg	T	0	-1.11129	-1.0272
	363	act	T	0	-0.619362	-1.17523
	363	aga	R	0	-1.0246	-1
	363	agc	S	0	-1.23517	-1.06903
	363	agg	R	0	-0.336979	-0.298266
	363	agt	S	0	-0.244706	-0.658118
	363	ata	I	0	-0.981259	-1.25189
	363	atc	I	0	-1.39284	-1.19717
	363	atg	M	0	-0.991481	-1.11421
	363	att	I	0	-1.30154	-1.04559
	363	caa	Q	0	0.396794	-0.0990476
	363	cac	H	0	0.198858	-0.647042
	363	cag	Q	1	0.44219	-0.407204
	363	cat	H	0	-0.723385	-0.854879
	363	cca	P	0	-0.853693	-0.209347
	363	ccc	P	0	-0.919259	-0.361705
	363	ccg	P	0	-1	-1.13795
	363	cct	P	0	0.277661	-0.269866
	363	cga	R	0	-0.676193	-0.755354
	363	cgc	R	0	0.0142048	0.282531
	363	cgg	R	0	0.0318376	-0.400089
	363	cgt	R	0	0.0108131	-0.316233
	363	cta	L	0	-1.10269	-1.08454
	363	ctc	L	0	-1.44059	-0.91766
	363	ctg	L	0	-1.10949	-1.12978
	363	ctt	L	0	-1.15462	-1.09915
	363	gaa	E	0	0.709973	0.108266
	363	gac	D	0	0.573161	0.00762311
	363	gag	E	0	1.03104	-0.236315
	363	gat	D	0	0.349349	-0.437157
	363	gca	A	0	-0.296266	-0.258563
	363	gcc	A	0	0.149753	-0.994015
	363	gcg	A	0	-0.347606	-0.798592
	363	gct	A	0	-0.389568	-0.241815
	363	gga	G	0	-0.949197	-0.889582
	363	ggc	G	0	-0.776056	-0.743129
	363	ggg	G	0	-0.523801	-0.134117
	363	ggt	G	0	0.409804	0.111104
	363	gta	V	0	-0.925007	-1.1176
	363	gtc	V	0	-1	-1
	363	gtg	V	0	-0.618799	-0.733725
	363	gtt	V	0	-0.503331	-0.967614
	363	taa	*	0	-0.71296	-0.889729
	363	tac	Y	0	-1.17593	-0.831829
	363	tag	*	0	-1.01357	-1.14822
	363	tat	Y	0	-0.920097	-1.12313
	363	tca	S	0	-1.12598	-1.01936
	363	tcc	S	0	-1.14314	-0.489907
	363	tcg	S	0	-1.20986	-0.680138
	363	tct	S	0	-1	-0.979838
	363	tga	*	0	-1.26591	-1.1733
	363	tgc	C	0	-1.29215	-0.676662
	363	tgg	W	0	0.0498805	-1.05537
	363	tgt	C	0	-0.700442	-1.09021
	363	tta	L	0	-1.07183	-1.31224
	363	ttc	F	0	-1.12901	-1.14823
	363	ttg	L	0	-1.25616	-1.1061
	363	ttt	F	0	-1.25986	-0.780717
	364	aaa	K	0	-0.997398	-1.01551
	364	aac	N	0	-0.191757	-1.07057
	364	aag	K	0	-1.20461	-0.955993
	364	aat	N	0	-0.297156	-0.451123
	364	aca	T	0	-1.2969	-1.04249
	364	acc	T	0	-0.664446	-0.883992
	364	acg	T	0	-1.08702	-0.828915
	364	act	T	0	-0.806396	-0.686866
	364	aga	R	0	-1.12492	-1.08523
	364	agc	S	0	0.473322	-0.767251
	364	agg	R	0	-1.28731	-1.08378
	364	agt	S	0	-0.129639	-1.20487
	364	ata	I	0	-1.42289	-0.96657
	364	atc	I	0	-1.27857	-1.18173
	364	atg	M	0	-1.01453	-1.02157
	364	att	I	0	-1.11527	-0.969151
	364	caa	Q	0	-1.26569	-0.864977
	364	cac	H	0	-0.0440302	-0.162709
	364	cag	Q	0	-1.10356	-0.642718
	364	cat	H	0	-0.309724	-0.508886
	364	cca	P	0	-0.293953	0.165792
	364	ccc	P	0	0.396794	-0.0990476
	364	ccg	P	0	-0.162447	0.323461
	364	cct	P	0	0.590804	0.145456
	364	cga	R	0	-1.16716	-1.00372
	364	cgc	R	0	-0.943412	-0.962023
	364	cgg	R	0	-0.725467	-0.954597
	364	cgt	R	0	-1.29155	-1.02591
	364	cta	L	0	-1.00856	-0.964196
	364	ctc	L	0	-0.779714	-0.923073
	364	ctg	L	0	-0.933128	-0.878874
	364	ctt	L	0	-1.14203	-1.03005
	364	gaa	E	0	-0.895322	-0.98247
	364	gac	D	0	-0.997953	-0.961348
	364	gag	E	0	-1.03044	-0.851923
	364	gat	D	0	-1.11395	-1.04371
	364	gca	A	0	0.319989	-0.84449
	364	gcc	A	0	-0.808125	-0.888264
	364	gcg	A	0	-0.341276	-0.24541
	364	gct	A	0	-0.681205	-1.00552
	364	gga	G	0	-0.680274	-0.790763
	364	ggc	G	0	-1.22611	-1.25055
	364	ggg	G	0	-0.98053	-0.914006
	364	ggt	G	0	-1.24969	-0.732153
	364	gta	V	0	-1.07899	-0.430857
	364	gtc	V	0	-0.349249	-1.12736
	364	gtg	V	0	-0.118758	-0.793926
	364	gtt	V	0	-0.454111	-0.911949
	364	taa	*	0	-1.07592	-1.0667
	364	tac	Y	0	-0.976915	-0.664806
	364	tag	*	0	-1.08173	-0.742403
	364	tat	Y	0	-1.36647	-0.477686
	364	tca	S	0	0.322745	-0.725946
	364	tcc	S	0	-0.310657	0.234621
	364	tcg	S	0	-0.155424	0.199264
	364	tct	S	0	-0.179746	0.32516
	364	tga	*	0	-1.21244	-1.07697
	364	tgc	C	0	-1.07741	-1.22795
	364	tgg	W	0	-1.13013	-1.05975
	364	tgt	C	0	-1.02099	-0.993993
	364	tta	L	0	-1	-1.11431
	364	ttc	F	0	-1.31948	-0.912407
	364	ttg	L	0	-0.834877	-0.840376
	364	ttt	F	0	-1.16207	-0.951421
	365	aaa	K	0	-0.990164	-1.01215
	365	aac	N	0	-0.554987	-0.742674
	365	aag	K	0	-1.19392	-0.988151
	365	aat	N	0	-0.350634	-1.06233
	365	aca	T	0	-0.802016	-0.891498
	365	acc	T	0	0.443322	-0.565029
	365	acg	T	0	-0.251562	-0.105227
	365	act	T	0	-0.608605	-0.525305
	365	aga	R	0	-0.972733	-0.8651
	365	agc	S	0	-0.142427	0.120613
	365	agg	R	0	-0.872765	-0.700095
	365	agt	S	0	0	-0.846511
	365	ata	I	0	-0.908506	-0.701878
	365	atc	I	0	-0.419878	-0.951433
	365	atg	M	0	-0.651202	-0.935157
	365	att	I	0	-0.68367	-1
	365	caa	Q	0	-1.15337	-0.902432
	365	cac	H	0	-1.10931	-1.01858
	365	cag	Q	0	-1.17385	-1.05125
	365	cat	H	0	-0.76993	-1.08378
	365	cca	P	0	0.187466	-0.857517
	365	ccc	P	0	0.33946	-0.35588
	365	ccg	P	0	-0.88357	-1.02232
	365	cct	P	0	-0.78441	-0.936254
	365	cga	R	0	-1.13156	-1.29133
	365	cgc	R	0	-1.1623	-0.831097
	365	cgg	R	0	-0.9087	-1.00743
	365	cgt	R	1	-153.007	-102.314
	365	cta	L	0	-1.06631	-1.02267
	365	ctc	L	0	-1.07268	-0.974183
	365	ctg	L	0	-1.2708	-1.11585
	365	ctt	L	0	-1.07191	-1.01497
	365	gaa	E	0	-0.963008	-0.928402
	365	gac	D	0	-0.919609	-0.905856
	365	gag	E	0	-1.15351	-0.98265
	365	gat	D	0	-0.490989	-0.791218
	365	gca	A	0	0.270536	0.112549
	365	gcc	A	0	0.787414	0.15752
	365	gcg	A	0	-0.221351	-0.188795
	365	gct	A	0	0.933314	0.179833
	365	gga	G	0	-1.06889	-0.92626
	365	ggc	G	0	-0.857985	-0.870408
	365	ggg	G	0	-1.04673	-0.878554
	365	ggt	G	0	-0.991766	-0.967555
	365	gta	V	0	0.60865	0.213051
	365	gtc	V	1	0.413313	-0.649296
	365	gtg	V	0	0.509631	-0.14018
	365	gtt	V	1	0.749702	-0.463173
	365	taa	*	0	-0.775673	-0.905493
	365	tac	Y	0	-0.755388	-0.805836
	365	tag	*	0	-0.834459	-1.00386
	365	tat	Y	0	0.940273	-0.476546
	365	tca	S	0	0.396794	-0.0990476
	365	tcc	S	0	0.674609	-0.0267572
	365	tcg	S	0	0.646576	0.0156798
	365	tct	S	0	0.565644	-0.0691476
	365	tga	*	0	-0.980061	-0.899051
	365	tgc	C	0	-1.10904	-0.931592
	365	tgg	W	0	-1.07623	-0.997729
	365	tgt	C	0	-0.118895	-0.277338
	365	tta	L	0	-0.141033	-0.310152
	365	ttc	F	0	-0.61912	-0.985581
	365	ttg	L	0	-0.388853	-0.756185
	365	ttt	F	0	-0.120806	-0.748301
	366	aaa	K	0	-1.0462	-0.925485
	366	aac	N	0	-1.1346	-0.934354
	366	aag	K	0	-1.13786	-1.00728
	366	aat	N	0	-1.10177	-0.971251
	366	aca	T	0	-1.16733	-1.01021
	366	acc	T	0	-1.05808	-1.01308
	366	acg	T	0	-0.837158	-0.930687
	366	act	T	0	-1.22041	-1.02157
	366	aga	R	0	-0.815266	-0.896109
	366	agc	S	0	-1.03613	-0.959489
	366	agg	R	0	-0.910043	-0.989581
	366	agt	S	0	-1.15755	-1.04039
	366	ata	I	0	-0.892531	-1.13206
	366	atc	I	0	-0.991994	-0.963489
	366	atg	M	0	-0.981941	-0.984087
	366	att	I	0	-0.994111	-0.969118
	366	caa	Q	0	-1.02879	-0.901197
	366	cac	H	0	-1	-0.927632
	366	cag	Q	0	-1.0983	-1.00091
	366	cat	H	0	-1.09135	-0.919802
	366	cca	P	0	-1.02229	-1.024
	366	ccc	P	0	-1.05492	-0.944712
	366	ccg	P	0	-1.09364	-1.01544
	366	cct	P	0	-1.05348	-0.946042
	366	cga	R	0	-0.533888	-0.714659
	366	cgc	R	0	-0.883042	-0.935157
	366	cgg	R	0	-0.700963	-0.900644
	366	cgt	R	0	-0.958645	-0.978894
	366	cta	L	0	-1.02559	-1.22072
	366	ctc	L	0	-0.90865	-1.03266
	366	ctg	L	0	-1.1349	-1.03833
	366	ctt	L	0	-0.992399	-0.936001
	366	gaa	E	0	-0.703915	-0.804281
	366	gac	D	0	-0.981259	-1.08741
	366	gag	E	0	-1.08627	-0.949826
	366	gat	D	0	-1.04076	-0.939497
	366	gca	A	0	-0.623689	-0.781486
	366	gcc	A	0	-1.07968	-0.972734
	366	gcg	A	0	-1	-0.904296
	366	gct	A	0	-1.19094	-0.958863
	366	gga	G	0	0.396794	-0.0990476
	366	ggc	G	0	-0.825513	-0.892885
	366	ggg	G	0	0.462876	-0.2312
	366	ggt	G	1	0.433051	-0.246015
	366	gta	V	0	-0.846929	-0.901807
	366	gtc	V	0	-0.910334	-1.01011
	366	gtg	V	0	-0.971072	-1.03755
	366	gtt	V	0	-1.02362	-0.988777
	366	taa	*	0	-0.922169	-0.989981
	366	tac	Y	0	-0.930147	-0.959239
	366	tag	*	0	-1	-0.968092
	366	tat	Y	0	-1	-0.966793
	366	tca	S	1	-153.163	-102.418
	366	tcc	S	0	-0.996442	-0.99375
	366	tcg	S	0	-1.39092	-0.965258
	366	tct	S	0	-0.994197	-1.01533
	366	tga	*	0	-0.591029	-0.774313
	366	tgc	C	0	-1.19985	-1.03853
	366	tgg	W	0	-1.01509	-0.999518
	366	tgt	C	0	-1.33757	-0.980087
	366	tta	L	0	-0.842392	-0.891105
	366	ttc	F	0	-1.00005	-1.01193
	366	ttg	L	0	-0.973409	-0.981844
	366	ttt	F	0	-1.05424	-0.968032
	367	aaa	K	0	-0.923461	-0.996398
	367	aac	N	0	-1.23075	-0.99395
	367	aag	K	0	-0.964301	-0.949255
	367	aat	N	0	-1.157	-0.893183
	367	aca	T	0	-0.951597	-0.994956
	367	acc	T	0	-0.757123	-0.965361
	367	acg	T	0	-0.985404	-0.938717
	367	act	T	0	-0.772769	-0.948489
	367	aga	R	0	-0.969538	-0.975823
	367	agc	S	0	-0.854619	-0.985392
	367	agg	R	0	-0.607346	-0.731526
	367	agt	S	0	-0.946423	-0.927013
	367	ata	I	0	-1.06036	-0.959862
	367	atc	I	0	-1.12218	-1.01683
	367	atg	M	0	-1.05325	-1.13538
	367	att	I	0	-0.980661	-0.935557
	367	caa	Q	0	-1.01204	-0.959211
	367	cac	H	1	-153.923	-1.01768
	367	cag	Q	0	-0.928415	-0.991493
	367	cat	H	0	-1.06753	-1
	367	cca	P	0	-1.05063	-0.957167
	367	ccc	P	0	-0.868706	-0.951708
	367	ccg	P	0	-1.13557	-1.03607
	367	cct	P	0	-1.0447	-1.01392
	367	cga	R	0	-1.0333	-0.957605
	367	cgc	R	0	-1.01996	-1.01798
	367	cgg	R	0	-0.878628	-0.920325
	367	cgt	R	0	-1.02421	-1.01225
	367	cta	L	0	-1.372	-0.988757
	367	ctc	L	0	-1.02129	-0.938906
	367	ctg	L	0	-0.875913	-0.935389
	367	ctt	L	0	-1.14056	-0.952595
	367	gaa	E	0	-0.971942	-0.977425
	367	gac	D	0	-1	-0.871338
	367	gag	E	0	-0.765319	-0.820611
	367	gat	D	0	-0.978049	-0.905015
	367	gca	A	0	-1.13997	-0.952203
	367	gcc	A	0	-1.17062	-0.982949
	367	gcg	A	0	-0.893122	-1.0167
	367	gct	A	0	-0.957053	-0.9068
	367	gga	G	0	-0.53535	-0.535612
	367	ggc	G	0	-0.712753	-0.834768
	367	ggg	G	0	0.396794	-0.0990476
	367	ggt	G	0	0.217253	0.042193
	367	gta	V	0	-0.866292	-0.959176
	367	gtc	V	0	-0.982281	-0.955246
	367	gtg	V	0	-0.866354	-0.90707
	367	gtt	V	0	-1.01861	-0.932042
	367	taa	*	0	-1.03256	-1.02204
	367	tac	Y	0	-0.95545	-0.982211
	367	tag	*	0	-1	-0.966615
	367	tat	Y	0	-1.06915	-0.972685
	367	tca	S	0	-0.961925	-1.04112
	367	tcc	S	1	-1.16716	-1.00372
	367	tcg	S	0	-1.05545	-0.946929
	367	tct	S	0	-1.03846	-1.09211
	367	tga	*	0	-1.08422	-0.996136
	367	tgc	C	0	-1.47681	-1.01216
	367	tgg	W	0	-0.860584	-0.967372
	367	tgt	C	0	-1.00305	-1.0276
	367	tta	L	0	-0.94188	-0.99502
	367	ttc	F	0	-1.23101	-0.955524
	367	ttg	L	0	-0.959173	-0.95195
	367	ttt	F	0	-0.968312	-0.930954
	368	aaa	K	0	-1.05277	-1.02318
	368	aac	N	0	-0.548395	-0.695211
	368	aag	K	0	-1.20313	-1.01571
	368	aat	N	0	-0.992904	-1.01869
	368	aca	T	0	-1.02063	-1.05293
	368	acc	T	0	-0.996952	-0.95481
	368	acg	T	0	-1.08652	-1.00162
	368	act	T	0	-1.1124	-0.944159
	368	aga	R	0	-1.08552	-1.04112
	368	agc	S	0	-1.02381	-0.972707
	368	agg	R	0	-1.09983	-0.930531
	368	agt	S	0	-0.972733	-0.952223
	368	ata	I	0	-1.16629	-1.00314
	368	atc	I	0	-0.909918	-0.959176
	368	atg	M	0	-1.01555	-0.973076
	368	att	I	0	-0.970654	-1.24482
	368	caa	Q	0	-1.05924	-1.03559
	368	cac	H	0	-0.814311	-0.883489
	368	cag	Q	0	-1.13095	-1.18715
	368	cat	H	0	-1	-0.92608
	368	cca	P	0	-1.0366	-0.936721
	368	ccc	P	0	-1.1096	-0.965376
	368	ccg	P	0	-1.09964	-0.992146
	368	cct	P	0	-0.879256	-0.992146
	368	cga	R	0	-1.28914	-1.00122
	368	cgc	R	0	-0.950023	-0.978594
	368	cgg	R	0	-0.874694	-0.894994
	368	cgt	R	0	-0.910698	-1.02165
	368	cta	L	0	-1	-1.11629
	368	ctc	L	0	-1.08998	-0.995371
	368	ctg	L	0	-0.894445	-0.968858
	368	ctt	L	0	-1.04735	-0.998599
	368	gaa	E	0	-0.84254	-0.967682
	368	gac	D	0	0.396794	-0.0990476
	368	gag	E	0	-0.854151	-0.953533
	368	gat	D	0	-0.506508	0
	368	gca	A	0	-1.02113	-1.08056
	368	gcc	A	0	-0.539283	-0.724994
	368	gcg	A	0	-1.14033	-0.964922
	368	gct	A	0	-0.97055	-0.915793
	368	gga	G	0	-0.915376	-0.988455
	368	ggc	G	0	-0.679703	-0.81379
	368	ggg	G	0	-1.03078	-0.970911
	368	ggt	G	0	-0.99568	-1.01825
	368	gta	V	0	-1.00016	-0.996228
	368	gtc	V	0	-1.02786	-0.96254
	368	gtg	V	0	-1.0287	-1.00098
	368	gtt	V	0	-0.923592	-0.982835
	368	taa	*	0	-1.00861	-1.04493
	368	tac	Y	0	-0.457528	-0.62959
	368	tag	*	0	-0.962761	-1.09816
	368	tat	Y	0	-1.14694	-0.990254
	368	tca	S	0	-1.07044	-1.01576
	368	tcc	S	0	-1.08813	-0.97106
	368	tcg	S	0	-1.21862	-0.994941
	368	tct	S	0	-1.08224	-1.01751
	368	tga	*	0	-1.32377	-0.99232
	368	tgc	C	0	-0.947173	-0.929834
	368	tgg	W	0	-0.961708	-0.983633
	368	tgt	C	0	-1.15837	-0.964458
	368	tta	L	0	-1.164	-1.04469
	368	ttc	F	0	-0.961599	-1.0409
	368	ttg	L	0	-1.30154	-1.05019
	368	ttt	F	0	-1.12544	-1.16349
	369	aaa	K	0	-0.818225	-0.628171
	369	aac	N	0	-1.07584	-0.709601
	369	aag	K	0	-0.699106	-0.973138
	369	aat	N	1	-153.007	-102.314
	369	aca	T	1	0.452643	-0.153934
	369	acc	T	0	-0.86648	-0.983633
	369	acg	T	0	-0.851902	-0.887112
	369	act	T	0	-0.814072	-0.843902
	369	aga	R	0	-1.05238	-1.03102
	369	agc	S	0	-1.07236	-0.960554
	369	agg	R	0	-1.10021	-1.07866
	369	agt	S	0	-0.873318	-1.14234
	369	ata	I	1	-153.938	-1.0275
	369	atc	I	0	-0.984281	-1.03332
	369	atg	M	0	-1.09218	-0.66604
	369	att	I	0	-1.28047	-1.04582
	369	caa	Q	0	-0.318097	-0.591487
	369	cac	H	0	-0.606925	-0.806587
	369	cag	Q	1	0.0395923	-0.0782449
	369	cat	H	1	-153.886	-0.992897
	369	cca	P	0	0.396794	-0.0990476
	369	ccc	P	0	0.771315	0.0680559
	369	ccg	P	0	0.163475	0.0240434
	369	cct	P	1	-0.159083	-0.461537
	369	cga	R	1	-0.116154	-0.407204
	369	cgc	R	0	-0.990623	-1.0029
	369	cgg	R	0	-0.808125	-0.868272
	369	cgt	R	1	153.805	102.015
	369	cta	L	0	-0.773201	-0.73257
	369	ctc	L	0	-0.732004	-0.967048
	369	ctg	L	0	-1.22811	-0.983633
	369	ctt	L	0	-1.24151	-0.85538
	369	gaa	E	0	-0.74831	-0.517091
	369	gac	D	0	-0.00467597	0.290998
	369	gag	E	1	-153.904	-0.589318
	369	gat	D	1	0.0395923	0.289568
	369	gca	A	0	0.704473	-0.629221
	369	gcc	A	0	-0.821899	-0.981225
	369	gcg	A	0	0.00318959	-0.0180415
	369	gct	A	1	0.245477	-0.3465
	369	gga	G	0	-1.0659	-0.661887
	369	ggc	G	1	-0.876606	-0.554899
	369	ggg	G	0	-1.09586	-0.946346
	369	ggt	G	0	-1.22711	-1.01026
	369	gta	V	0	-0.962792	-1.17888
	369	gtc	V	1	0.396794	102.136
	369	gtg	V	0	-1.09794	-0.934527
	369	gtt	V	0	-1.23722	-1.11111
	369	taa	*	0	-1	-1.05591
	369	tac	Y	0	-0.968346	-0.661382
	369	tag	*	0	-0.924448	-1.04955
	369	tat	Y	0	-0.90009	-0.929549
	369	tca	S	0	-0.243522	-0.81121
	369	tcc	S	1	0.476827	-0.00176617
	369	tcg	S	0	-0.649013	-0.64742
	369	tct	S	0	-1.09218	-1.16132
	369	tga	*	1	-153.007	-102.314
	369	tgc	C	1	0.50683	-0.242725
	369	tgg	W	0	-0.893122	-1.13246
	369	tgt	C	0	0.390394	-0.320399
	369	tta	L	0	-1.17232	-1.05024
	369	ttc	F	0	-0.998876	-1.07607
	369	ttg	L	0	-1.01141	-1.02372
	369	ttt	F	0	-1.00907	-1.05722
	370	aaa	K	1	-0.0988611	-0.329533
	370	aac	N	0	-0.976427	-0.985166
	370	aag	K	1	-153.007	-0.13895
	370	aat	N	1	-0.783588	-0.791218
	370	aca	T	0	-0.994412	-0.923598
	370	acc	T	0	-0.982332	-1.00012
	370	acg	T	1	0.396794	-0.0990476
	370	act	T	0	-1.10666	-0.963414
	370	aga	R	0	-1.18905	-0.984902
	370	agc	S	0	-0.78166	-1.01512
	370	agg	R	0	-0.855038	-0.915305
	370	agt	S	0	-0.992263	-0.998847
	370	ata	I	0	-0.835487	-0.962982
	370	atc	I	0	-0.911786	-1.08419
	370	atg	M	0	-0.9718	-1.03343
	370	att	I	0	-1.21499	-0.931817
	370	caa	Q	1	153.444	102.076
	370	cac	H	0	-0.988318	-1.25659
	370	cag	Q	1	0.396794	-0.0990476
	370	cat	H	0	-0.960226	-1.21058
	370	cca	P	0	-0.999612	-1.20341
	370	ccc	P	0	-0.951004	-0.941525
	370	ccg	P	0	-1.08924	-0.99488
	370	cct	P	0	-1.13581	-0.982835
	370	cga	R	0	-1.03968	-0.961852
	370	cgc	R	0	-1.27014	-1.03893
	370	cgg	R	0	-1	-0.937776
	370	cgt	R	0	-1.01861	-1.00852
	370	cta	L	0	-0.978587	-0.945154
	370	ctc	L	0	-1.04851	-0.989165
	370	ctg	L	0	-0.905177	-1.05979
	370	ctt	L	0	-0.917149	-1.00162
	370	gaa	E	0	0.396794	-0.0990476
	370	gac	D	1	-0.380991	-0.687443
	370	gag	E	0	-0.164063	0.25065
	370	gat	D	0	-0.930522	-0.638501
	370	gca	A	0	-0.93991	-0.872298
	370	gcc	A	0	-1.00783	-1.00134
	370	gcg	A	0	-1.00719	-0.953235
	370	gct	A	0	-0.945957	-0.899407
	370	gga	G	0	-0.700963	-0.786539
	370	ggc	G	0	-1.07968	-0.945437
	370	ggg	G	0	-0.964975	-0.898458
	370	ggt	G	0	-0.941056	-1.1371
	370	gta	V	0	-0.832108	-0.856956
	370	gtc	V	0	-0.878502	-0.958236
	370	gtg	V	0	-0.917414	-1.04487
	370	gtt	V	0	-1.17368	-1.13914
	370	taa	*	0	-0.500273	-0.775017
	370	tac	Y	0	-1.0057	-0.949541
	370	tag	*	0	-1.00636	-0.984586
	370	tat	Y	1	-153.254	-102.478
	370	tca	S	0	-0.934677	-1.006
	370	tcc	S	1	-153.163	-102.418
	370	tcg	S	1	0.396794	-0.0990476
	370	tct	S	0	-0.789277	-1.06326
	370	tga	*	0	-0.794825	-0.95209
	370	tgc	C	0	-1	-1.07922
	370	tgg	W	1	-0.713111	-102.919
	370	tgt	C	0	-0.937728	-0.981924
	370	tta	L	0	-0.989345	-0.973247
	370	ttc	F	0	-0.942852	-1.0738
	370	ttg	L	0	-1.01794	-0.996087
	370	ttt	F	0	-0.882247	-0.998357
	371	aaa	K	0	-1.18701	-1
	371	aac	N	0	-1	-1
	371	aag	K	0	-1	-1
	371	aat	N	0	-1.03575	-1
	371	aca	T	0	-0.111077	-1.45508
	371	acc	T	0	-0.958409	-1.409
	371	acg	T	0	-1.21162	-1.27219
	371	act	T	0	-1.13036	-1.14546
	371	aga	R	1	-150.987	-146.781
	371	agc	S	0	-1	-1
	371	agg	R	0	-1	-1
	371	agt	S	0	-1.09899	-1.01447
	371	ata	I	0	-0.195561	-0.260406
	371	atc	I	0	0.0344388	-0.285879
	371	atg	M	0	-1.21327	-1.2738
	371	att	I	0	0.0107295	0.0625176
	371	caa	Q	0	-1	-1
	371	cac	H	0	-1	-1
	371	cag	Q	1	-150.618	-146.422
	371	cat	H	1	-150.778	-146.578
	371	cca	P	0	-1	-1
	371	ccc	P	0	-1.43787	-1
	371	ccg	P	1	-150.934	-146.73
	371	cct	P	0	-1	-1
	371	cga	R	0	-1	-1
	371	cgc	R	0	-1	-1
	371	cgg	R	1	-150.707	-146.509
	371	cgt	R	1	-150.431	-146.241
	371	cta	L	0	-0.969523	-1
	371	ctc	L	0	-1.40457	-1.45983
	371	ctg	L	0	-1.10065	-1
	371	ctt	L	1	-0.537965	-0.884889
	371	gaa	E	1	-0.946611	-146.754
	371	gac	D	0	-1	-1
	371	gag	E	1	-150.914	-146.711
	371	gat	D	0	-1	-1
	371	gca	A	0	-1.37628	-1.34564
	371	gcc	A	0	-1.26638	-1.32545
	371	gcg	A	0	-1.08524	-1.38416
	371	gct	A	0	-1.05931	-1.46814
	371	gga	G	1	-150.971	-146.766
	371	ggc	G	0	-1.25712	-1
	371	ggg	G	0	-1	-1
	371	ggt	G	0	-0.992534	-1.294
	371	gta	V	0	0.0883091	-0.326436
	371	gtc	V	0	0.332	-0.080669
	371	gtg	V	0	-0.225759	0.150086
	371	gtt	V	0	0.667946	0.00842473
	371	taa	*	0	-1	-1
	371	tac	Y	0	-1	-1
	371	tag	*	0	-1	-1
	371	tat	Y	1	-150.831	-146.63
	371	tca	S	0	-1	-1
	371	tcc	S	0	-1	-1
	371	tcg	S	0	-1	-1
	371	tct	S	0	-1.07986	-1
	371	tga	*	0	-1	-1
	371	tgc	C	0	-1	-1
	371	tgg	W	0	-1	-1
	371	tgt	C	1	-150.975	-146.769
	371	tta	L	0	-1	-1.19282
	371	ttc	F	0	-0.859961	-1
	371	ttg	L	0	-1	-1
	371	ttt	F	0	-0.778455	-1.03208
	372	aaa	K	0	-1.65121	-1.26893
	372	aac	N	0	-1.10948	-1.38913
	372	aag	K	0	-1.25793	-1.46541
	372	aat	N	0	-1.27577	-1
	372	aca	T	0	-0.922584	-1.15404
	372	acc	T	0	-0.946403	-0.927587
	372	acg	T	0	-1.18107	-1.53885
	372	act	T	0	-1.05791	-0.745676
	372	aga	R	0	-1.57003	-1.23769
	372	agc	S	0	-1.1318	-1
	372	agg	R	0	-1	-1.31485
	372	agt	S	0	-1	-1.40547
	372	ata	I	0	-0.80717	-0.797738
	372	atc	I	0	-1.33639	-0.923794
	372	atg	M	0	-1	-1.20378
	372	att	I	0	-1.37863	-0.903367
	372	caa	Q	0	-1.12586	-0.728504
	372	cac	H	0	-1.14704	-1.16168
	372	cag	Q	0	-1.15253	-1.26243
	372	cat	H	0	-1	-1.13687
	372	cca	P	0	-1.48782	-1.19672
	372	ccc	P	0	-1.2064	-1.4153
	372	ccg	P	0	-1.21062	-1.50608
	372	cct	P	0	-1.28147	-1.16676
	372	cga	R	0	-1.33459	-1.09541
	372	cgc	R	0	-1.21086	-1.2429
	372	cgg	R	0	-1.52842	-1.34541
	372	cgt	R	0	-1.12562	-1
	372	cta	L	0	-0.949412	-0.959845
	372	ctc	L	0	-0.944379	-0.688129
	372	ctg	L	0	-1	-1
	372	ctt	L	0	-0.974713	-0.647191
	372	gaa	E	0	-1.25896	-1.02964
	372	gac	D	0	-1.29525	-1.22394
	372	gag	E	0	-1.18477	-1.05019
	372	gat	D	0	-1.15396	-1.3643
	372	gca	A	0	-1.09899	-0.82731
	372	gcc	A	0	-1	-0.693044
	372	gcg	A	0	-1	-1.38814
	372	gct	A	0	-1.48177	-1.53491
	372	gga	G	0	-1.3476	-1.16956
	372	ggc	G	1	-150.391	-146.202
	372	ggg	G	0	-0.878429	-1
	372	ggt	G	0	-1.21671	-1.42533
	372	gta	V	0	0.0107295	0.0625176
	372	gtc	V	0	0.139224	0.0967578
	372	gtg	V	0	-0.0211186	0.0617251
	372	gtt	V	0	-0.0452512	-0.378862
	372	taa	*	0	-1	-1.42612
	372	tac	Y	0	-1.30197	-1.15037
	372	tag	*	0	-0.774407	-1.24717
	372	tat	Y	0	-1.37816	-1.13778
	372	tca	S	0	-1.44152	-1.34758
	372	tcc	S	0	-1.38002	-1.43596
	372	tcg	S	0	-1.072	-1.43278
	372	tct	S	0	-1	-1.22355
	372	tga	*	0	-1	-1.33276
	372	tgc	C	0	-0.770042	-0.902531
	372	tgg	W	0	-1.20469	-1.17877
	372	tgt	C	0	-0.722062	-0.667664
	372	tta	L	0	-0.751077	-0.824317
	372	ttc	F	0	-1.27689	-1.33566
	372	ttg	L	0	-0.563057	-0.466712
	372	ttt	F	0	-1	-0.889856
	373	aaa	K	0	0.370412	-0.256032
	373	aac	N	0	0.539495	-0.447881
	373	aag	K	0	0.300262	0.403807
	373	aat	N	0	0.209577	0.278885
	373	aca	T	0	-0.604827	-0.485582
	373	acc	T	0	-0.579433	-0.387175
	373	acg	T	0	-0.464005	-0.887737
	373	act	T	0	-0.521458	-0.398115
	373	aga	R	0	0.167902	0.00528009
	373	agc	S	0	-0.802637	-0.574306
	373	agg	R	0	0.0107295	0.0625176
	373	agt	S	0	-0.814767	-0.570259
	373	ata	I	0	-0.925251	-0.9937
	373	atc	I	0	-1.1399	-1.05426
	373	atg	M	0	0.0196091	0.116854
	373	att	I	0	-1.23133	-1.02973
	373	caa	Q	0	0.667413	0.469579
	373	cac	H	0	-0.360044	-0.00456661
	373	cag	Q	0	0.388247	0.151724
	373	cat	H	0	-0.0103661	-0.162693
	373	cca	P	0	-1.20314	-1.01197
	373	ccc	P	0	-1.25106	-1.17231
	373	ccg	P	0	-1.26834	-1.15879
	373	cct	P	0	-1.19252	-1.01875
	373	cga	R	0	-0.0572839	-0.182441
	373	cgc	R	0	0.0790885	-0.254795
	373	cgg	R	0	0.016759	-0.0684045
	373	cgt	R	0	0.0338914	-0.0568011
	373	cta	L	0	-0.743429	-0.0516264
	373	ctc	L	0	-0.506506	-0.20039
	373	ctg	L	0	-0.141003	-0.437346
	373	ctt	L	0	-0.126235	-0.967912
	373	gaa	E	0	-0.0117261	0.471527
	373	gac	D	0	-0.263671	0.0700238
	373	gag	E	0	0.25112	0.880975
	373	gat	D	0	-1.22201	-0.0878237
	373	gca	A	0	-0.423058	-0.650517
	373	gcc	A	0	-0.379284	-0.545137
	373	gcg	A	0	-0.353764	-0.366487
	373	gct	A	0	-0.425441	-0.985841
	373	gga	G	0	-1.14724	-0.989465
	373	ggc	G	0	-1.12709	-1.08078
	373	ggg	G	0	-1.11504	-0.929604
	373	ggt	G	0	-0.945498	-1.05237
	373	gta	V	0	-0.259646	-0.480793
	373	gtc	V	0	-0.425668	-0.370642
	373	gtg	V	0	-1.04763	-0.704482
	373	gtt	V	0	-0.497543	-0.545514
	373	taa	*	0	-0.883176	-0.9672
	373	tac	Y	0	-1.07163	-0.74908
	373	tag	*	0	-1.19522	-0.928838
	373	tat	Y	0	-1.09507	-0.75868
	373	tca	S	0	-1.36216	-1.12222
	373	tcc	S	0	-0.910627	-0.842648
	373	tcg	S	0	-0.61819	-0.811928
	373	tct	S	0	-0.987899	-0.847381
	373	tga	*	0	-0.994627	-1.08635
	373	tgc	C	0	-0.726681	-0.53277
	373	tgg	W	0	-0.984179	-0.994917
	373	tgt	C	0	-0.920361	-0.526108
	373	tta	L	0	-0.650527	-0.715179
	373	ttc	F	0	-0.250851	-0.383123
	373	ttg	L	0	-0.0818508	-0.496968
	373	ttt	F	0	-0.131242	-0.416709
	374	aaa	K	0	-1.03713	-1.02032
	374	aac	N	0	-0.972356	-0.754105
	374	aag	K	0	-1.08841	-0.755523
	374	aat	N	0	-1.11286	-1.05049
	374	aca	T	0	-1.19989	-0.834832
	374	acc	T	0	-0.966957	-1.08196
	374	acg	T	0	-0.863635	-0.835537
	374	act	T	0	-0.80717	-0.410968
	374	aga	R	0	-1.00498	-1.14317
	374	agc	S	0	-0.926573	-1.14317
	374	agg	R	0	-0.970272	-1.18567
	374	agt	S	0	-1.3294	-1.00368
	374	ata	I	0	-1.04751	-0.611045
	374	atc	I	0	-1.05447	-0.703353
	374	atg	M	0	-1.11271	-1.02781
	374	att	I	0	-0.497725	-0.465042
	374	caa	Q	0	-0.937613	-0.891542
	374	cac	H	0	0.0107295	0.0625176
	374	cag	Q	0	-1.24026	-0.955972
	374	cat	H	0	0.0522872	0.055101
	374	cca	P	0	-0.995754	-0.953056
	374	ccc	P	0	-1.04984	-1.04463
	374	ccg	P	0	-0.988508	-1.47122
	374	cct	P	0	-1.04014	-1.25361
	374	cga	R	0	-1.22541	-1.18512
	374	cgc	R	0	-1.00617	-0.980299
	374	cgg	R	0	-1.19576	-1.0219
	374	cgt	R	0	-1.05846	-1.14843
	374	cta	L	0	-0.833411	-0.948776
	374	ctc	L	0	-0.764308	-0.913436
	374	ctg	L	0	-0.951319	-0.922423
	374	ctt	L	0	-0.898647	-1.02933
	374	gaa	E	0	-1.28879	-1.15135
	374	gac	D	0	-1.12513	-1.03989
	374	gag	E	0	-1.23224	-1.14405
	374	gat	D	0	-1	-0.742177
	374	gca	A	0	-1.3174	-0.959053
	374	gcc	A	0	-1.22272	-1.00042
	374	gcg	A	0	-1.23133	-0.977873
	374	gct	A	0	-1.0691	-1.05498
	374	gga	G	0	-1.12152	-1.09789
	374	ggc	G	0	-1.14173	-1.09502
	374	ggg	G	0	-1.24136	-1.12774
	374	ggt	G	0	-1.05317	-1.1181
	374	gta	V	0	-1.07895	-1.29135
	374	gtc	V	0	-1.12215	-1.22416
	374	gtg	V	0	-1.13	-1.00313
	374	gtt	V	0	-0.867249	-1.05252
	374	taa	*	0	-1.12562	-1.18856
	374	tac	Y	0	-0.814581	-0.804196
	374	tag	*	0	-1.02668	-1.03084
	374	tat	Y	0	-0.942125	-1.09679
	374	tca	S	0	-1.0796	-1.01146
	374	tcc	S	0	-1.15148	-1.11322
	374	tcg	S	0	-1.06287	-1.04085
	374	tct	S	0	-1.04041	-1.01901
	374	tga	*	0	-1	-1.06639
	374	tgc	C	0	-1.00985	-0.979347
	374	tgg	W	0	-0.921135	-0.250263
	374	tgt	C	0	-1.04658	-0.774862
	374	tta	L	0	-0.935749	-0.968195
	374	ttc	F	0	-0.896723	-1.03226
	374	ttg	L	0	-1.14112	-0.985221
	374	ttt	F	0	-0.777746	-0.94532
	375	aaa	K	0	-1.02591	-0.943401
	375	aac	N	0	-0.0801228	-0.177074
	375	aag	K	0	-1.03685	-0.911147
	375	aat	N	0	-0.51858	-0.131638
	375	aca	T	0	0.390919	0.572127
	375	acc	T	0	0.439984	0.528059
	375	acg	T	0	0.432515	0.564003
	375	act	T	0	0.444122	0.424285
	375	aga	R	0	-0.664395	-0.61288
	375	agc	S	0	0.0107295	0.0625176
	375	agg	R	0	-0.986876	-0.796238
	375	agt	S	0	0.00452615	-0.0116025
	375	ata	I	0	-0.939601	-0.824345
	375	atc	I	0	-0.565659	-0.514417
	375	atg	M	0	0.395002	-0.322763
	375	att	I	0	-0.775107	-0.866288
	375	caa	Q	0	-0.640373	-0.497533
	375	cac	H	0	0.433855	0.781042
	375	cag	Q	0	-0.607823	-0.442668
	375	cat	H	0	0.589255	0.675398
	375	cca	P	0	-0.977438	-0.892846
	375	ccc	P	0	-1.10658	-0.93517
	375	ccg	P	0	-1.10539	-1.01027
	375	cct	P	0	-0.949506	-0.980549
	375	cga	R	0	-0.934046	-0.94075
	375	cgc	R	0	-0.834769	-0.748019
	375	cgg	R	0	-1.103	-0.942118
	375	cgt	R	0	-0.977362	-0.779349
	375	cta	L	0	-0.053367	0.102454
	375	ctc	L	0	0.150773	-0.459911
	375	ctg	L	0	-0.143781	0.0225674
	375	ctt	L	0	0.0768326	-0.0826199
	375	gaa	E	0	-0.936965	-1.09177
	375	gac	D	0	-1.084	-1.09199
	375	gag	E	0	-1	-0.944902
	375	gat	D	0	-1.09222	-0.935961
	375	gca	A	0	-0.609476	-0.667535
	375	gcc	A	0	-0.688461	-0.595966
	375	gcg	A	0	-0.582175	-0.617348
	375	gct	A	0	-0.740068	-0.680703
	375	gga	G	0	-1.06482	-1.04275
	375	ggc	G	0	-0.928656	-1.03852
	375	ggg	G	0	-0.942542	-1.03429
	375	ggt	G	0	-1	-0.95167
	375	gta	V	0	-1.03194	-0.938836
	375	gtc	V	0	-0.999102	-1.17473
	375	gtg	V	0	-0.990422	-0.908893
	375	gtt	V	0	-1.03949	-0.936234
	375	taa	*	0	-0.649128	-0.859195
	375	tac	Y	0	0.700841	0.173845
	375	tag	*	0	-0.71738	-0.714999
	375	tat	Y	0	0.70291	0.584569
	375	tca	S	0	0.0955748	0.181472
	375	tcc	S	0	0	-0.0134283
	375	tcg	S	0	-0.300362	0.202312
	375	tct	S	0	-0.0317812	0.171151
	375	tga	*	0	-0.937875	-0.843042
	375	tgc	C	0	-0.0280174	-0.00205476
	375	tgg	W	0	0.287601	0.424848
	375	tgt	C	0	0.126334	-0.296233
	375	tta	L	0	-0.154505	0.13317
	375	ttc	F	0	0.69912	0.563442
	375	ttg	L	0	-0.0527335	-0.0890952
	375	ttt	F	0	0.699675	0.543417
	376	aaa	K	0	-1.00888	-1.04207
	376	aac	N	0	-1.00203	-1.05252
	376	aag	K	0	-0.894201	-1.17319
	376	aat	N	0	-1.11074	-0.891516
	376	aca	T	0	-0.966016	-0.609166
	376	acc	T	0	-0.714074	-0.631421
	376	acg	T	0	-0.591182	-0.313718
	376	act	T	0	-0.902867	-0.592144
	376	aga	R	0	-0.942485	-0.983131
	376	agc	S	0	-1.17731	-0.942458
	376	agg	R	0	-1.03126	-1.09679
	376	agt	S	0	-0.750121	-0.72893
	376	ata	I	0	-0.790281	-0.850223
	376	atc	I	0	-1	-0.867006
	376	atg	M	0	-0.829072	-0.821552
	376	att	I	0	-0.929293	-0.946073
	376	caa	Q	0	-1.08569	-0.953832
	376	cac	H	0	-0.915432	-1.20042
	376	cag	Q	0	-1.13907	-0.894835
	376	cat	H	0	-1.03905	-0.995163
	376	cca	P	0	-0.441436	-0.92629
	376	ccc	P	0	-1.04735	-0.99442
	376	ccg	P	0	-1.13551	-0.996263
	376	cct	P	0	-1.09899	-1.05737
	376	cga	R	0	-1.07804	-0.994096
	376	cgc	R	0	-1.05047	-1.03922
	376	cgg	R	0	-0.961889	-1.00415
	376	cgt	R	0	-1	-1.17625
	376	cta	L	0	-1.16014	-0.816549
	376	ctc	L	0	-1.00377	-0.882901
	376	ctg	L	0	-0.943255	-1.05891
	376	ctt	L	0	-0.899423	-0.92629
	376	gaa	E	0	-0.959022	-1.11322
	376	gac	D	0	-0.950852	-0.921969
	376	gag	E	0	-0.811611	-0.955119
	376	gat	D	0	-1.01265	-1.10724
	376	gca	A	0	-0.93703	-0.99738
	376	gcc	A	0	-0.755483	-0.795647
	376	gcg	A	0	-0.93413	-0.973787
	376	gct	A	0	-0.788277	-0.953558
	376	gga	G	0	-1.00716	-0.986673
	376	ggc	G	0	-1.12179	-0.940022
	376	ggg	G	0	-0.984785	-1.02565
	376	ggt	G	0	-1.09351	-1.15733
	376	gta	V	0	-0.937776	-0.88022
	376	gtc	V	0	-0.857292	-0.791645
	376	gtg	V	0	-1	-1.09402
	376	gtt	V	0	-0.58653	-0.979823
	376	taa	*	0	-0.851437	-0.988972
	376	tac	Y	0	-0.0742707	0.00433855
	376	tag	*	0	-0.97418	-0.9975
	376	tat	Y	0	0.000861228	-0.801156
	376	tca	S	0	-0.601439	-0.85398
	376	tcc	S	0	-1.04428	-1.00024
	376	tcg	S	0	-0.97932	-0.955447
	376	tct	S	0	-0.842516	-0.978527
	376	tga	*	0	-0.938699	-1.24164
	376	tgc	C	0	-1.16223	-0.92779
	376	tgg	W	0	-1.06932	-1.00422
	376	tgt	C	0	-1.12315	-1.09947
	376	tta	L	0	-0.932275	-1.00053
	376	ttc	F	0	-0.403463	0.417071
	376	ttg	L	0	-0.956064	-0.967576
	376	ttt	F	0	0.0107295	0.0625176
	377	aaa	K	0	-0.944469	-1.02112
	377	aac	N	0	0.0916883	-0.598884
	377	aag	K	0	-0.901136	-0.917844
	377	aat	N	0	0.0107295	0.0625176
	377	aca	T	0	0.248678	0.293719
	377	acc	T	0	0.00576871	-0.179895
	377	acg	T	0	0.204711	-0.651207
	377	act	T	0	0.415013	0.156433
	377	aga	R	0	-1.00734	-1.03782
	377	agc	S	0	-1.12562	-1.18856
	377	agg	R	0	-1.04537	-0.89704
	377	agt	S	0	-0.905462	-0.812474
	377	ata	I	0	0.231468	0.19473
	377	atc	I	0	-0.176792	0.103726
	377	atg	M	0	-0.24553	-0.0998176
	377	att	I	0	-0.150057	-0.0950546
	377	caa	Q	0	-1.10689	-0.974455
	377	cac	H	0	-1.11942	-1.03434
	377	cag	Q	0	-0.889315	-0.756841
	377	cat	H	0	-0.998752	-0.86929
	377	cca	P	0	-0.278656	-0.410031
	377	ccc	P	0	-0.211913	-0.346441
	377	ccg	P	0	-0.129057	-0.265979
	377	cct	P	0	-0.37732	-0.1366
	377	cga	R	0	-0.915432	-0.984151
	377	cgc	R	0	-1.06708	-1.04495
	377	cgg	R	0	-0.912446	-0.684878
	377	cgt	R	0	-1.04581	-0.944153
	377	cta	L	0	-0.0565317	-0.783909
	377	ctc	L	0	-0.12882	0.242892
	377	ctg	L	0	0.148238	0.535121
	377	ctt	L	0	0.191032	0.360559
	377	gaa	E	0	-0.88032	-1.11857
	377	gac	D	0	-0.867845	-0.96642
	377	gag	E	0	-0.90906	-0.785987
	377	gat	D	0	-0.818062	-0.671045
	377	gca	A	0	0.0734162	-0.0717062
	377	gcc	A	0	-0.243659	-0.376517
	377	gcg	A	0	-0.143331	-0.0980277
	377	gct	A	0	-0.283767	-0.426693
	377	gga	G	0	-1.04552	-0.766584
	377	ggc	G	0	-0.919237	-1.00823
	377	ggg	G	0	-0.978233	-1.02383
	377	ggt	G	0	-0.989632	-1.07106
	377	gta	V	0	0.451269	0.152321
	377	gtc	V	0	0.833789	0.524927
	377	gtg	V	0	0.656386	0.384461
	377	gtt	V	0	0.440823	0.683587
	377	taa	*	0	-1.04317	-1.08162
	377	tac	Y	0	-1.12562	-1
	377	tag	*	0	-1.02309	-1.14494
	377	tat	Y	0	-1.08832	-1.0041
	377	tca	S	0	-0.840712	-0.880893
	377	tcc	S	0	-0.279801	-0.81457
	377	tcg	S	0	-0.820334	-0.859939
	377	tct	S	0	0.243965	0.00796165
	377	tga	*	0	-1.09478	-1.09707
	377	tgc	C	0	0.309579	-0.234236
	377	tgg	W	0	-0.943818	-1.09844
	377	tgt	C	0	0.16086	-0.117536
	377	tta	L	0	0.312616	0.0615413
	377	ttc	F	0	-0.96033	-0.879629
	377	ttg	L	0	-0.0291394	0.167668
	377	ttt	F	0	-1.04748	-0.935836
	378	aaa	K	0	-1.07791	-1.04168
	378	aac	N	0	-1	-0.966227
	378	aag	K	0	-0.965739	-1.0868
	378	aat	N	0	-1.04531	-1.03852
	378	aca	T	0	-0.868308	-0.895423
	378	acc	T	0	-1.11098	-0.987156
	378	acg	T	0	-1.04159	-0.977254
	378	act	T	0	-1.01316	-1.01769
	378	aga	R	0	-1.23314	-0.949047
	378	agc	S	0	-0.981448	-1.13503
	378	agg	R	0	-1.30471	-1.06635
	378	agt	S	0	-1	-1.08196
	378	ata	I	0	-0.990543	-0.870034
	378	atc	I	0	-1.10575	-0.973346
	378	atg	M	0	-1.06482	-1.27762
	378	att	I	0	-1.1343	-0.945017
	378	caa	Q	0	-1.22296	-0.925346
	378	cac	H	0	-1.12024	-0.996165
	378	cag	Q	0	-1.02068	-0.99205
	378	cat	H	0	-0.950463	-1.1049
	378	cca	P	0	-0.924843	-0.970779
	378	ccc	P	0	-1.11401	-1.04768
	378	ccg	P	0	-1.15972	-0.900166
	378	cct	P	0	-1.07804	-0.994096
	378	cga	R	0	-1.0762	-1.14049
	378	cgc	R	0	-0.978861	-0.992108
	378	cgg	R	0	-0.880576	-0.950254
	378	cgt	R	0	-1.05309	-0.98363
	378	cta	L	0	-0.950572	-0.946392
	378	ctc	L	0	-1.04424	-1.08904
	378	ctg	L	0	-0.984416	-0.929263
	378	ctt	L	0	-1.00037	-0.970127
	378	gaa	E	0	-1.10716	-1.09867
	378	gac	D	0	-1.14319	-1.07999
	378	gag	E	0	-1.03415	-1.00298
	378	gat	D	0	-1	-1.02705
	378	gca	A	0	-1.07359	-1.18567
	378	gcc	A	0	-1.069	-0.968195
	378	gcg	A	0	-0.944247	-0.966999
	378	gct	A	0	-1.08569	-1.01533
	378	gga	G	0	-0.945657	-0.937293
	378	ggc	G	0	-0.964514	-1.37596
	378	ggg	G	0	-0.978474	-0.976238
	378	ggt	G	0	-1.11192	-1.0123
	378	gta	V	0	-0.915153	-1.01447
	378	gtc	V	1	-0.765526	-0.73261
	378	gtg	V	0	-0.72096	-0.680543
	378	gtt	V	1	-0.728462	-0.650606
	378	taa	*	0	-1.01577	-0.877453
	378	tac	Y	0	-0.216657	-0.82828
	378	tag	*	0	-1.18136	-0.994096
	378	tat	Y	0	-0.833759	-0.75654
	378	tca	S	0	-1.12562	-1.00139
	378	tcc	S	0	-1.04317	-1.10837
	378	tcg	S	0	-0.98009	-0.950403
	378	tct	S	0	-1.01992	-0.912403
	378	tga	*	0	-1.10065	-0.993561
	378	tgc	C	0	0.0177803	0.0562147
	378	tgg	W	0	-0.956701	-1.00391
	378	tgt	C	0	0.0107295	0.0625176
	378	tta	L	0	-1.04058	-1.03392
	378	ttc	F	0	-1.06118	-1.09734
	378	ttg	L	0	-1.05385	-1.07106
	378	ttt	F	0	-0.996682	-1.00805
	379	aaa	K	0	-0.600058	-0.677453
	379	aac	N	0	-0.819386	-0.207501
	379	aag	K	0	-1.1825	-0.731237
	379	aat	N	0	-0.703189	-0.384749
	379	aca	T	0	-1.07403	-1.0088
	379	acc	T	0	-0.976537	-1.14405
	379	acg	T	0	-1.1696	-0.887252
	379	act	T	0	-1	-1
	379	aga	R	0	-0.823068	-0.673258
	379	agc	S	0	-1.04476	-1.01329
	379	agg	R	0	-0.932321	-0.659816
	379	agt	S	0	-1.14196	-1.11777
	379	ata	I	0	-1.0762	-0.992307
	379	atc	I	0	-0.946981	-0.844123
	379	atg	M	0	-0.32318	-0.577484
	379	att	I	0	-1.10284	-0.985263
	379	caa	Q	0	0.134861	-0.10636
	379	cac	H	0	-0.935291	-0.694134
	379	cag	Q	0	0.0486623	0.277251
	379	cat	H	0	-0.451993	-0.845912
	379	cca	P	0	-0.924322	-0.94124
	379	ccc	P	0	-1.20827	-0.983525
	379	ccg	P	0	-1.38187	-1.02175
	379	cct	P	0	-1.18098	-1.0942
	379	cga	R	0	-1.10338	-0.879662
	379	cgc	R	0	-0.924229	-0.981147
	379	cgg	R	0	-1.1643	-0.772893
	379	cgt	R	0	-0.914597	-0.995558
	379	cta	L	0	-1.03796	-0.955119
	379	ctc	L	0	-1.36614	-0.97791
	379	ctg	L	0	-0.612089	-1.05636
	379	ctt	L	0	-1.15428	-0.981562
	379	gaa	E	0	-0.760717	-0.624005
	379	gac	D	0	-0.542326	-0.787776
	379	gag	E	0	-0.363971	-0.592568
	379	gat	D	0	-0.638878	-0.863389
	379	gca	A	0	0.0426302	0.0218584
	379	gcc	A	0	-0.00932708	-0.0870069
	379	gcg	A	0	-0.449744	-0.229477
	379	gct	A	0	-0.199605	-0.325158
	379	gga	G	0	0.0107295	0.0625176
	379	ggc	G	0	-0.406439	0.240626
	379	ggg	G	0	-0.302871	-0.0318545
	379	ggt	G	0	-0.310407	-0.175511
	379	gta	V	0	-0.843022	-0.582887
	379	gtc	V	0	-1.03764	-0.682672
	379	gtg	V	0	-0.88631	-0.908125
	379	gtt	V	0	-0.871161	-0.884295
	379	taa	*	0	-0.964207	-1.03158
	379	tac	Y	0	-0.474885	-0.827865
	379	tag	*	0	-1.0977	-0.97562
	379	tat	Y	0	-0.297672	-0.400327
	379	tca	S	0	-0.951551	-1.01928
	379	tcc	S	0	-1.04638	-1.06772
	379	tcg	S	0	-1.00596	-1.05358
	379	tct	S	0	-0.953174	-0.81658
	379	tga	*	0	-0.870286	-0.796381
	379	tgc	C	0	-0.942916	-1.01088
	379	tgg	W	0	-0.859686	-0.968916
	379	tgt	C	0	-1.11173	-0.990121
	379	tta	L	0	-0.955222	-0.53254
	379	ttc	F	0	-0.565926	-0.366906
	379	ttg	L	0	-0.919922	-0.813004
	379	ttt	F	0	-0.569958	-0.756342
	380	aaa	K	0	-0.968771	-0.939395
	380	aac	N	0	-0.923819	-1.03128
	380	aag	K	0	-1.08489	-1.01173
	380	aat	N	0	-1.30372	-1
	380	aca	T	1	-0.482717	-0.650022
	380	acc	T	0	-0.751642	-0.853414
	380	acg	T	0	-0.463001	-0.387758
	380	act	T	0	-0.465249	-0.929403
	380	aga	R	0	-0.881137	-0.897072
	380	agc	S	0	-0.901136	-0.413832
	380	agg	R	0	-0.831311	-0.834263
	380	agt	S	0	-1	-0.991708
	380	ata	I	0	-1.16717	-1.08078
	380	atc	I	0	-0.792898	-1.06088
	380	atg	M	0	-0.201665	-0.364642
	380	att	I	0	-0.877176	-0.597595
	380	caa	Q	0	-0.836524	-1
	380	cac	H	0	-0.679575	-0.944474
	380	cag	Q	0	-0.917257	-0.82478
	380	cat	H	0	-0.790878	-0.992606
	380	cca	P	0	0.402144	-0.0967555
	380	ccc	P	0	0.4173	0.14844
	380	ccg	P	0	0.325259	0.36444
	380	cct	P	0	0.2077	-0.00976788
	380	cga	R	0	-1	-0.859709
	380	cgc	R	0	-1.11837	-1.01621
	380	cgg	R	0	-0.934281	-1.00248
	380	cgt	R	0	-1	-1.11305
	380	cta	L	0	-1	-1.00956
	380	ctc	L	0	-0.93324	-1.03821
	380	ctg	L	0	-0.890385	-0.948827
	380	ctt	L	0	-1.02377	-0.941321
	380	gaa	E	0	-1.00531	-0.867282
	380	gac	D	0	-0.968771	-1.3801
	380	gag	E	0	-0.81205	-0.768384
	380	gat	D	0	-0.945359	-1.01325
	380	gca	A	0	-0.307039	-0.0676935
	380	gcc	A	0	0.0137429	-0.288528
	380	gcg	A	0	-0.764839	-0.890104
	380	gct	A	0	0.143772	-0.0590949
	380	gga	G	0	0.143456	0.121463
	380	ggc	G	0	-0.239756	0
	380	ggg	G	0	0.0107295	0.0625176
	380	ggt	G	0	-0.00753075	0.0618521
	380	gta	V	0	-0.10151	-0.764982
	380	gtc	V	0	-0.797223	-0.837226
	380	gtg	V	0	-0.519778	-0.463862
	380	gtt	V	0	-0.766703	-0.671701
	380	taa	*	0	-1.05242	-1.07839
	380	tac	Y	0	-1.04445	-0.961438
	380	tag	*	0	-0.980784	-1
	380	tat	Y	0	-0.80717	-0.878867
	380	tca	S	0	-0.220845	-0.218726
	380	tcc	S	0	-0.0885329	-0.205758
	380	tcg	S	0	0.18439	-0.590412
	380	tct	S	0	-0.553437	-0.457059
	380	tga	*	0	-1.17952	-0.979347
	380	tgc	C	0	-0.647331	-0.9039
	380	tgg	W	0	-0.599954	-0.493453
	380	tgt	C	0	-0.516191	-0.780816
	380	tta	L	0	-1.00706	-1.09844
	380	ttc	F	0	-0.921342	-1.02888
	380	ttg	L	0	-0.946219	-1.04085
	380	ttt	F	0	-0.991292	-0.928341
